# Supplementary material
Source: HighWire-hosted journal article supplement (https://bmjopen.bmj.com/content/6/3/e010565)
Supplement: inline-supplementary-material-1 [file inline-supplementary-material-1.pdf]

## Topic Guide

### Questions

#### Searching skills

- How do you usually search for medical information? (Search strategy)
  - Where do you search? (e.g. CPGs, journals, books, etc) Why?
  - How do you search?
    - Do you find it easy to search for information?
    - If not, what are the reasons (barriers\*)?
    - If yes, what are the reasons (facilitators\*)
  - How is the working environment here?

#### Access

- How do you access to this information? What are the initiatives that you take to look for valid information?
- Do you find it easy to search for information?
  - if yes, what are the reasons (facilitators)
  - if not, what are the reasons (barriers)
- Do you think that is important for you to get accurate medical information which is from a reliable source? Why?

#### Appraisal

- Do you assess or appraise the information that you get?
  - if yes, how do you do it?
  - if no, why not?
- Do you find it easy to assess the information?
  - if yes, what are the reasons (facilitators)
  - if not, what are the reasons (barriers)

#### EBM

- What is your view about evidence-based medicine (EBM)?
- What do you understand by EBM?
- Where did you learn about EBM?
- Do you practice EBM?
  - If yes,
    - How do you practice EBM?
    - Under what circumstances?
    - How much time do you spend?
  - If not, why not? Do you intend to practise EBM?

- Do you assess the information? (Appraisal)
  - If yes, how?
  - If no, why not?
  - Do you find it easy to assess the information?
    - If not, what are the reasons (barriers\*)?
    - If yes, what are the reasons (facilitators\*)
  
- When do you use the information? (Implementation)
  - Probe: What condition? With who?
  - Do you find it easy to use the information?
    - If not, what are the reasons (barriers\*)?
    - If yes, what are the reasons (facilitators\*)
  
- Do you have any suggestions how to make the practice of EBM easier for you?
  
- We are going to develop an EBM support service to provide clinical evidence to help answer your clinical queries. (Explain the intervention)
  - What do you think?
  - Explore whether it is feasible and acceptable.
  
- Do you have any other comments or suggestions?

**Thank you.**

\* Barriers and facilitators: Probe for doctor, patient and system factors
